# Supplementary material
Source: Springer Nature journal article supplement (https://www.springermedizin.de/resource/supplementary/13063_2011_978_MOESM4_ESM.pdf/9619556)
Supplement: MOESM4 [file 9619556]

Patient selection processes –  
Admission for ACS

Patients selected for intervention  
– dHMR

### Intervention Processes

#### Patient Focus – dHMR interview

- Assessing knowledge and providing education
- Mediating psychosocial inputs (what do their friends say and is this correct)

- Improve patient's belief in their own actions and ability to improve (self-efficacy)

Positive behaviour change

#### Professional Focus – dHMR report; agreed management plan; pharmacist education

- Improve/correct Knowledge-base – through consistent referral letters and consistency with dHMR report
- Offer opportunities to develop skills and expertise – to pharmacists only

- Improved attitudes toward provision of appropriate care (behavioural intention)

Professional behaviour/practice changes

### Health System Factors

#### Organisational Design

- Intervention enablers – consistency in dHMR referral letter content; pre-existing funding for dHMR service
- Intervention barriers – GP approval and forwarding of dHMR referral letters

Combined effect of organisational enablers and barriers on overall intervention process

#### Inter-professional Relationships and Coordination

- Is inter-professional collaboration able to occur – through follow-up report and agreed management plan
- What is the quality of this collaboration – by written report only OR by telephone discussion OR by meeting discussion
- What happens when this doesn't occur – i.e. the control group

### Outcomes

Clinical  
eg. adherence,  
readmissions

Functional  
eg. QOL

Health Care Expenditure –  
dHMR costs vs functional  
and clinical outcome savings

Consumer Satisfaction –  
previously established
